# Supplementary material for: A new near-infrared ratiometric fluorescent probe for hydrazine
Source: Royal Society of Chemistry journal article supplement (doi:10.1039/c7ra04270a), 2017-01-01
Supplement: c7ra04270a1.pdf [file c7ra04270a1.pdf]

## **A new near-infrared ratiometric fluorescent probe for hydrazine**

Yangyang He,<sup>a,b</sup> Zhanxian Li,<sup>b</sup> Bingjie Shi,<sup>b</sup> Zhen An,<sup>b</sup> Mingming Yu,<sup>b</sup> Liuhe Wei,<sup>b</sup>  
Zhonghai Ni<sup>\*,a</sup>

<sup>a</sup> *School of Chemical Engineering and Technology, China University of Mining and Technology, Xuzhou 221116, Jiangsu Province, China*

<sup>b</sup> *College of Chemistry and Molecular Engineering, Zhengzhou University, Zhengzhou 450001, China*

\* Corresponding author

E-mail: nizhonghai@cumt.edu.cn.

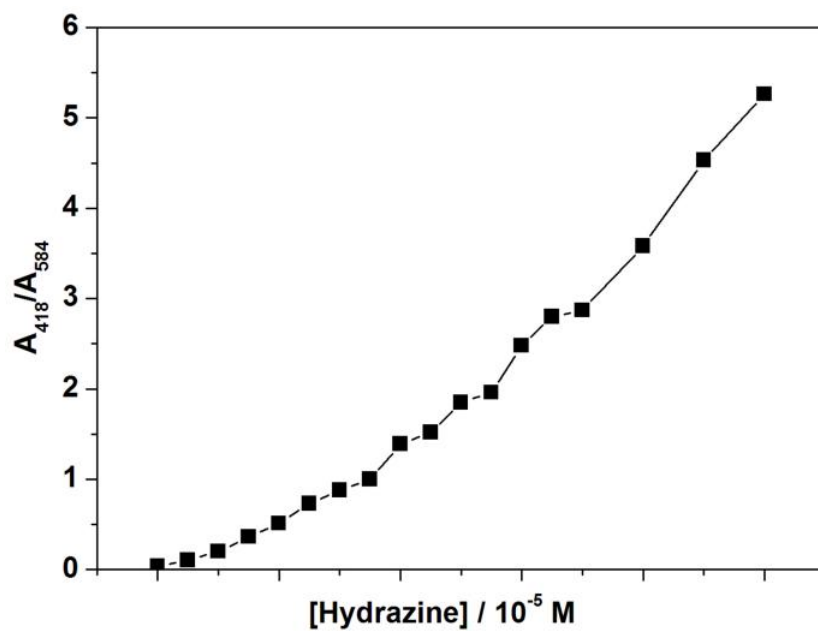

**Fig. S1** Absorbance of compound **1** [ $1.0 \times 10^{-5}$  M in 5:5 (v/v) 0.01M HEPES/DMSO pH 7.4] (black circle) as a function of addition of hydrazine water solution.  $A_{418}$  and  $A_{584}$  represent the absorbance at 418 nm and 584 nm. The reaction time is 24 hour.

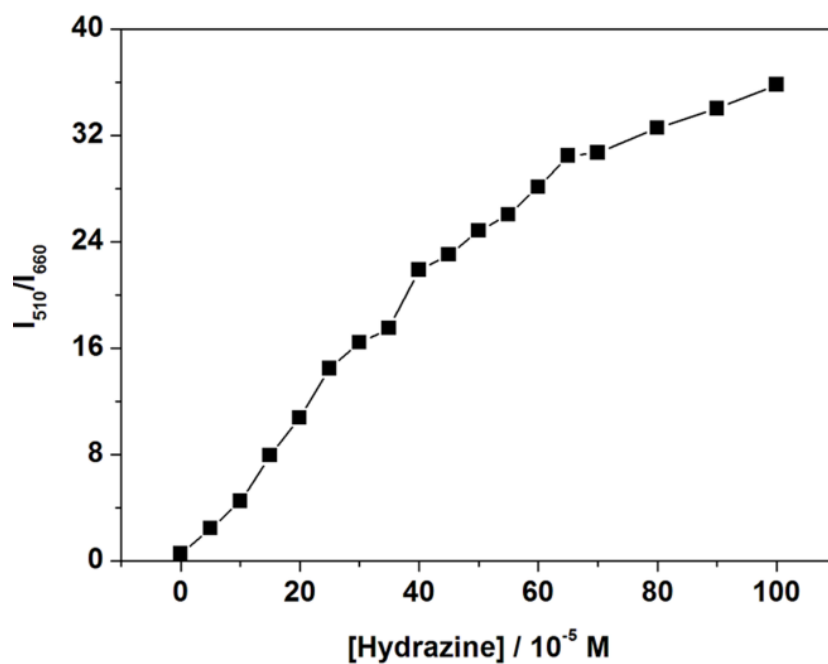

**Fig. S2** The relationship of ratiometric fluorescence change of probe **1** [ $1.0 \times 10^{-5}$  M in 5:5 (v/v) 0.01 M HEPES/DMSO, pH 7.4] with the concentration of hydrazine upon excitation at 450 nm.  $I_{510}$  and  $I_{660}$  represent the emission intensity of probe **1** at 510 nm and 660 nm respectively.

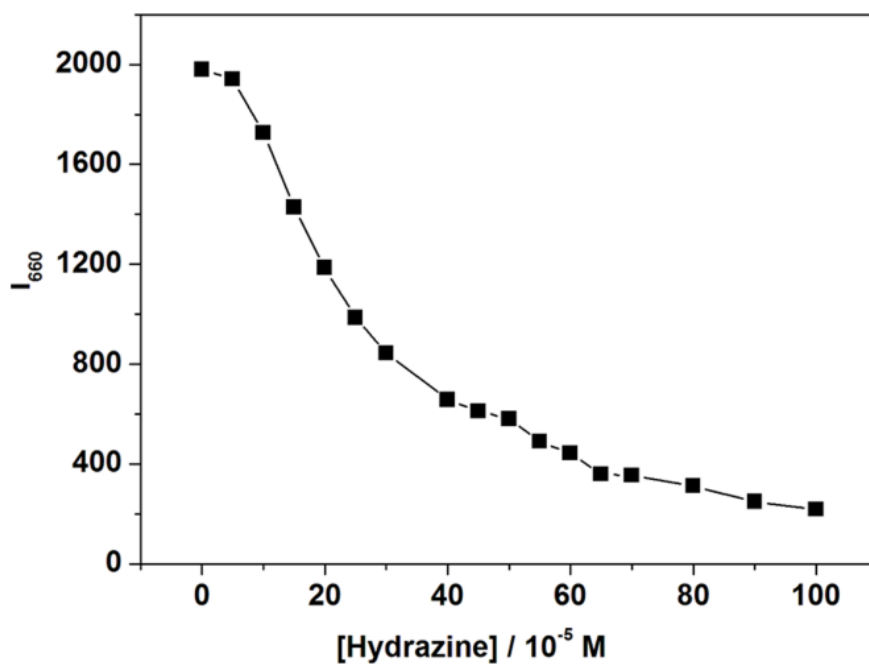

**Fig. S3** The relationship of fluorescence change at 660 nm of probe **1** [ $1.0 \times 10^{-5}$  M in 5:5 (v/v) 0.01M HEPES/DMSO pH 7.4] with the concentration of hydrazine upon excitation at 5100 nm.  $I_{660}$  represents the emission intensity of probe **1** at 660 nm.

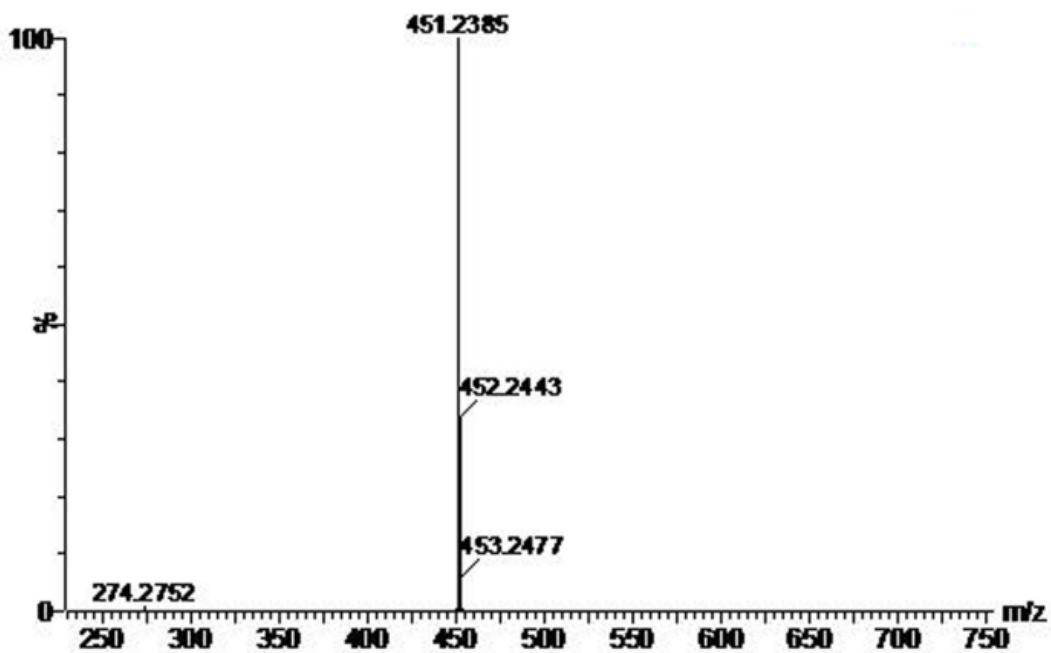

**Fig. S4** HRMS spectrum of probe **1**.

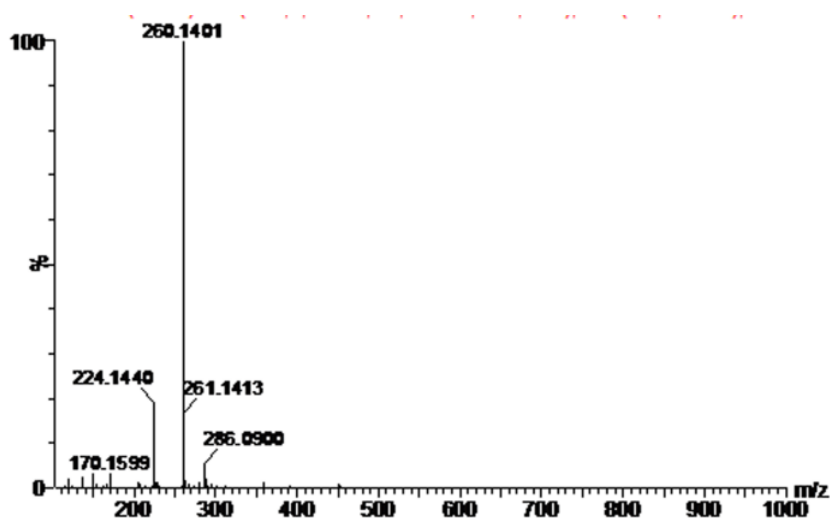

Fig. S5 HRMS spectrum of probe **1** reaction with hydrazine.

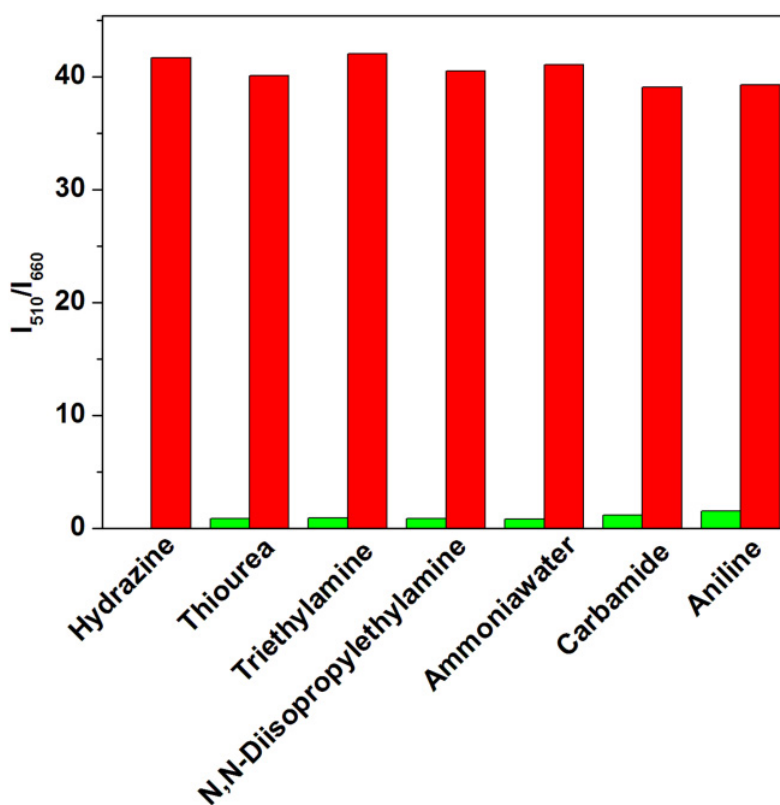

**Fig. S6** Fluorescence responses of **1** [ $1.0 \times 10^{-5}$  M in 5:5 (v/v) 0.01M HEPES/DMSO pH 7.4] upon addition of different species (100 equiv of species relative to **1**) (green bars) with excitation at 450 nm, and fluorescence changes of the mixture of **1** and hydrazine ( $1.0 \times 10^{-3}$  M in water) after addition of an excess of the indicated species (100 equiv relative to **1**) (red bars) with excitation at 450 nm.  $I_{510}$  and  $I_{660}$  represent the emission intensity at 510 nm. Intensity means the emission intensity at 660 nm. The species used were thiourea, triethylamine, N,N-diisopropylethylamine, ammonia water, carbamide, aniline.

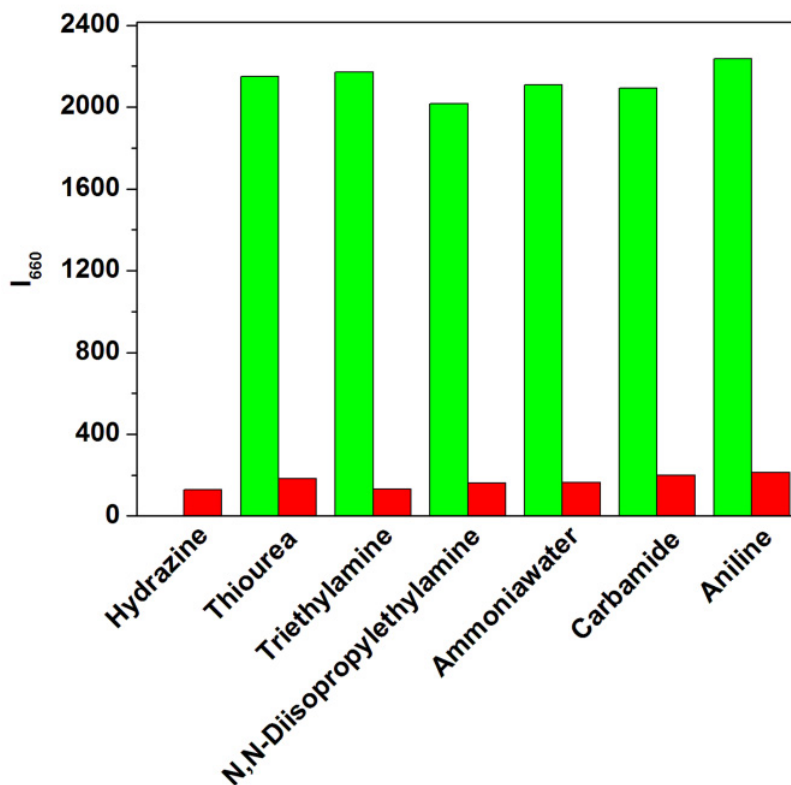

**Fig. S7** Fluorescence responses of **1** [ $1.0 \times 10^{-5}$  M in 5:5 (v/v) 0.01M HEPES/DMSO pH 7.4] upon addition of different species (100 equiv of species relative to **1**) (green bars) with excitation at 580 nm, and fluorescence changes of the mixture of **1** and hydrazine ( $1.0 \times 10^{-3}$  M in water) after addition of an excess of the indicated species (100 equiv relative to **1**) (red bars) with excitation at 580 nm.  $I_{660}$  represent the emission intensity at 660 nm. Intensity means the emission intensity at 660 nm. The species used were thiourea, triethylamine, N,N-diisopropylethylamine, ammonia water, carbamide, aniline.

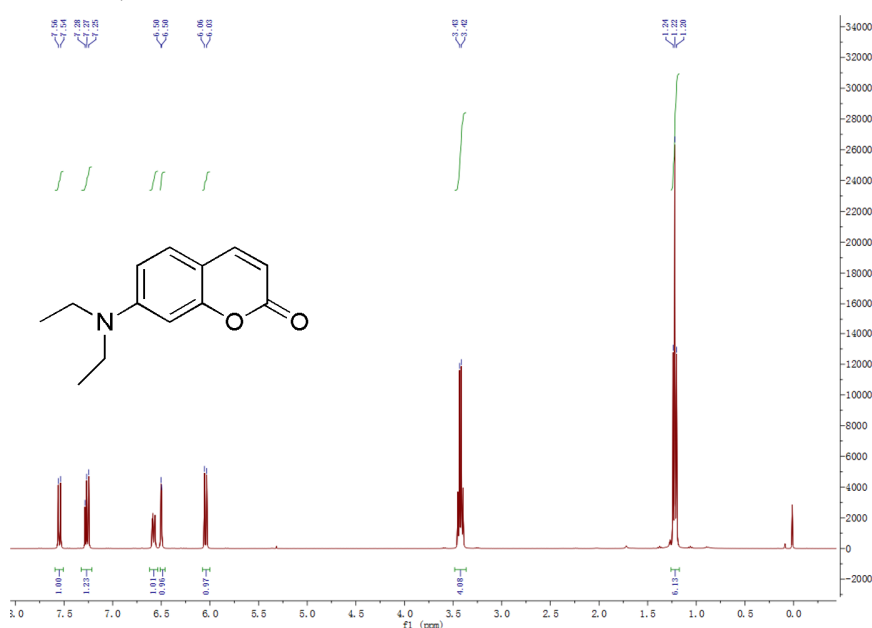

**Fig. S8**  $^1\text{H}$  NMR spectrum of compound **4**.

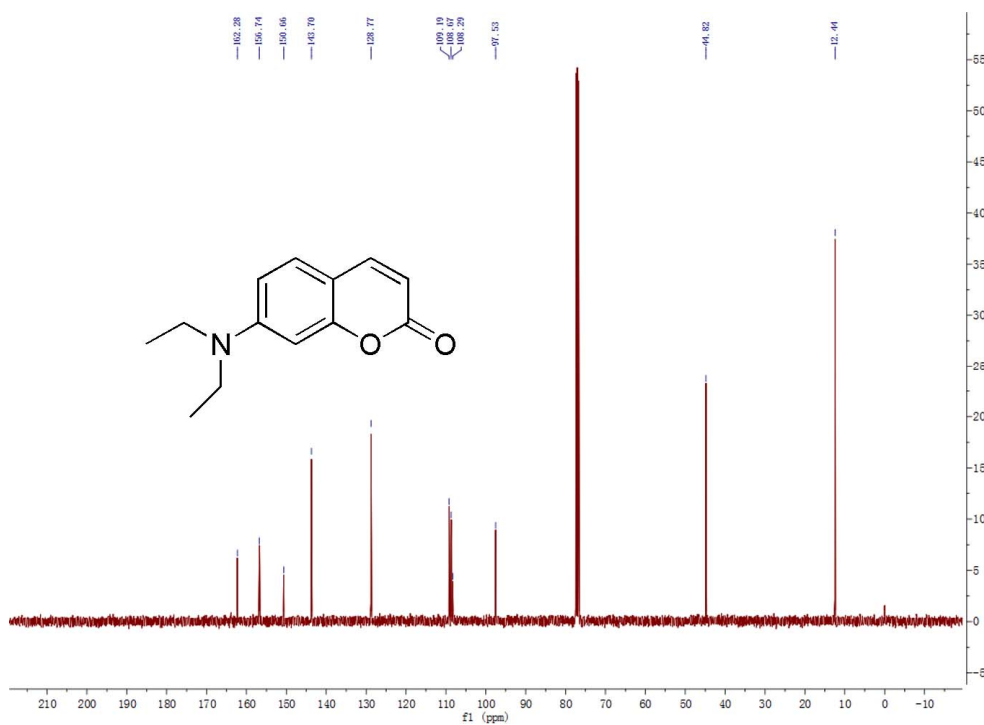

Fig. S9  $^{13}\text{C}$  NMR spectrum of compound 4.

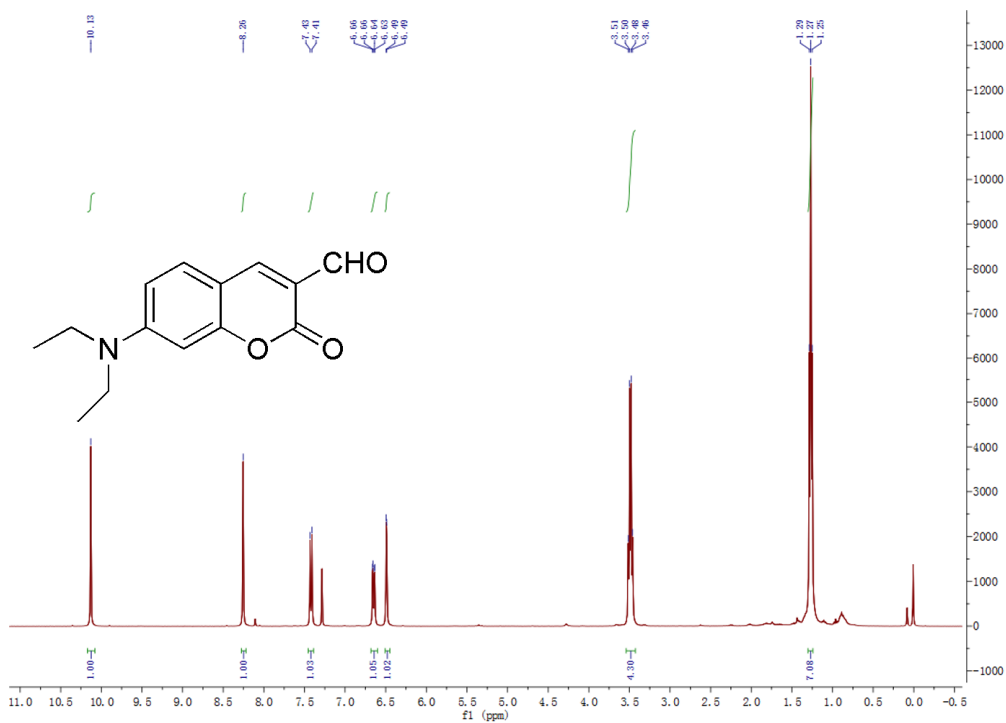

Fig. S10  $^1\text{H}$  NMR spectrum of compound 3.

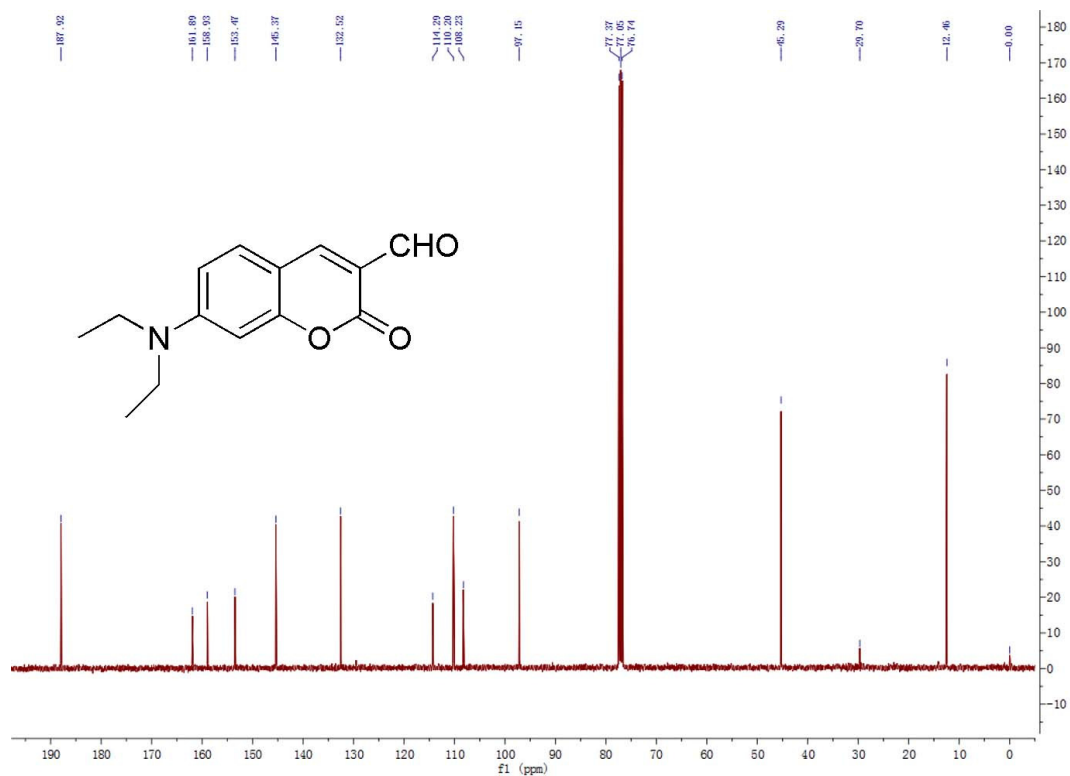

**Fig. S11**  $^{13}\text{C}$  NMR spectrum of compound 3.

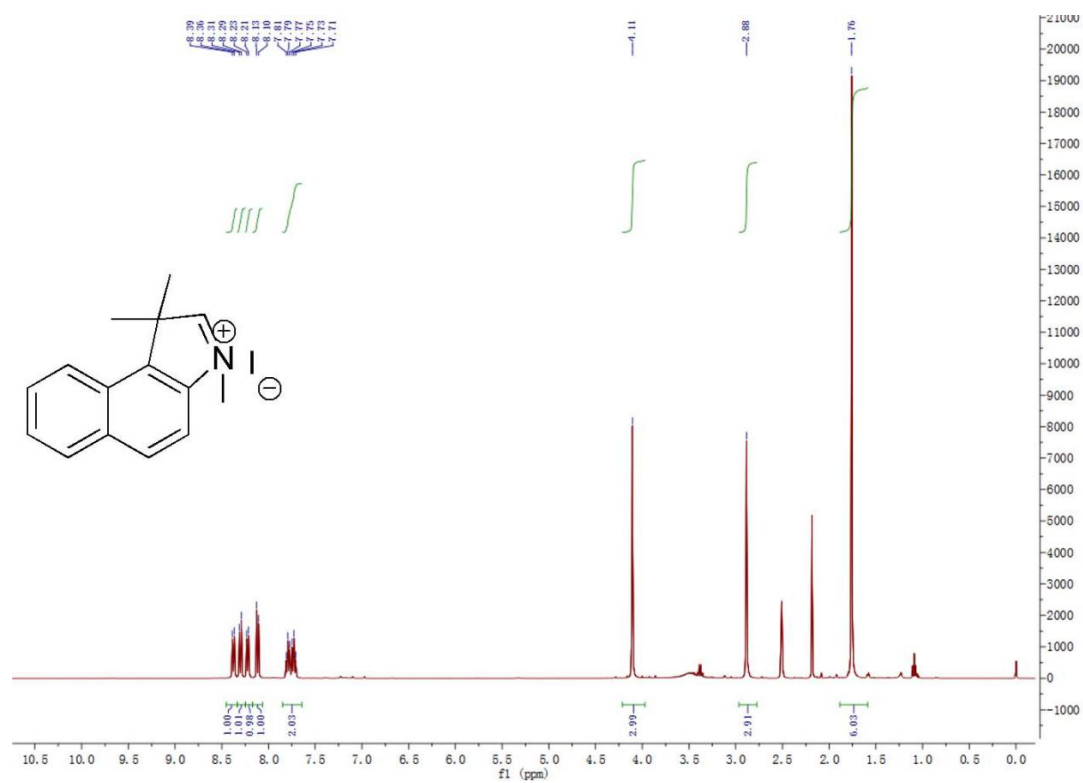

**Fig. S12**  $^1\text{H}$  NMR spectrum of compound 2.

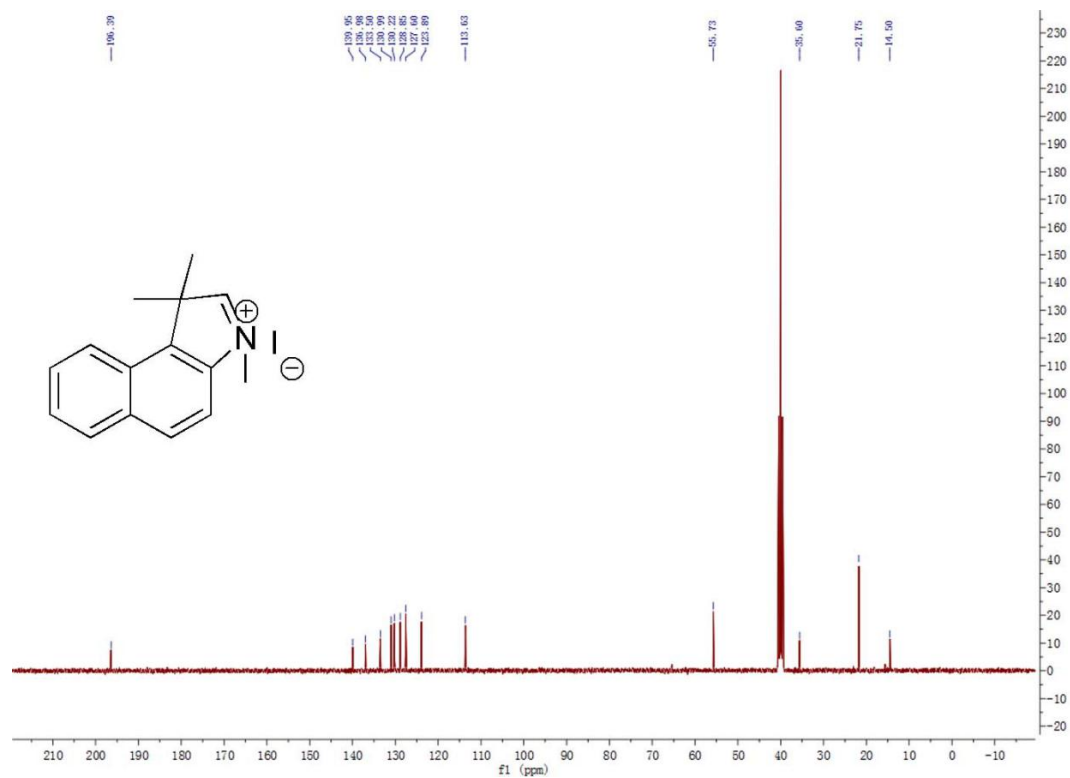

Fig. S13  $^{13}\text{C}$  NMR spectrum of compound 2.

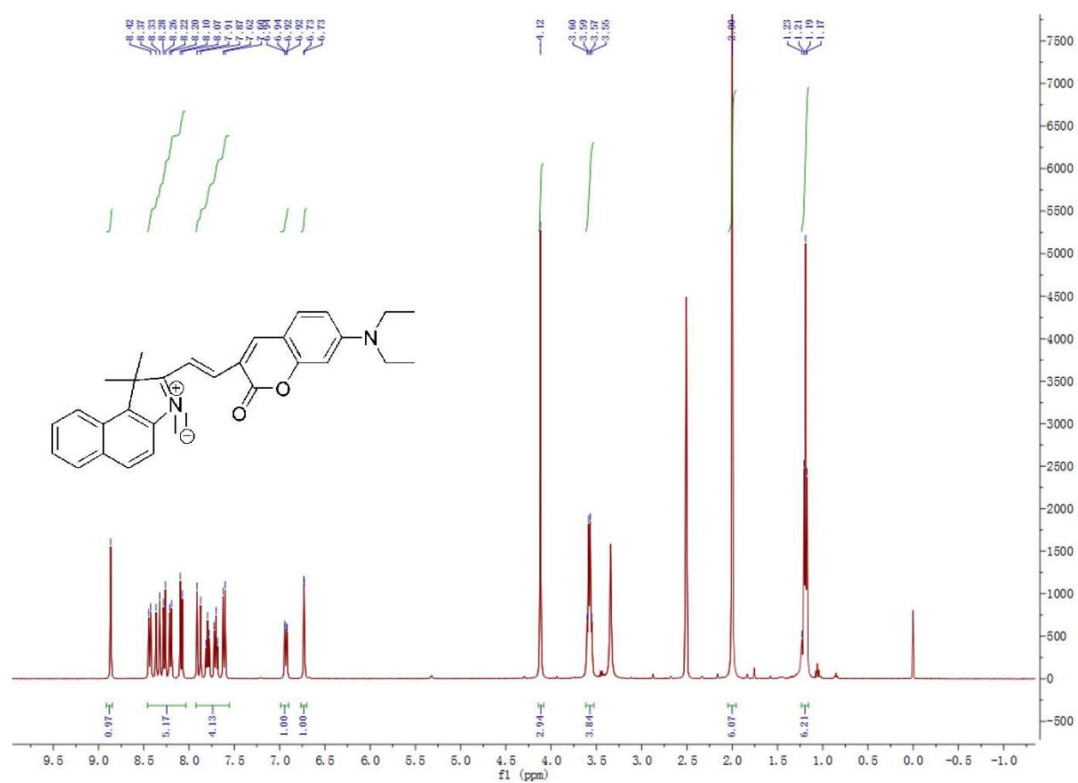

Fig. S14  $^1\text{H}$  NMR spectrum of compound 1.



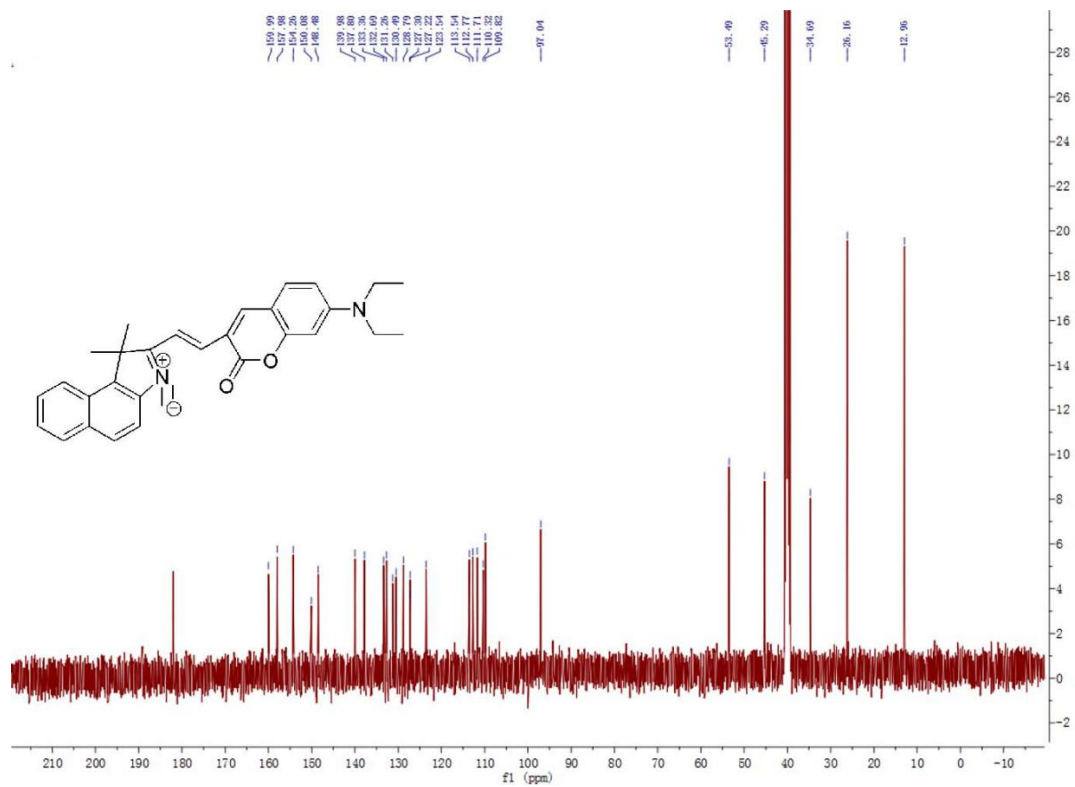

Fig. S15  $^{13}\text{C}$  NMR spectrum of compound 1.
